# Supplementary material
Source: Springer Nature journal article supplement (https://www.springermedizin.de/resource/supplementary/12943_2011_949_MOESM12_ESM.pdf/9551742)

**A**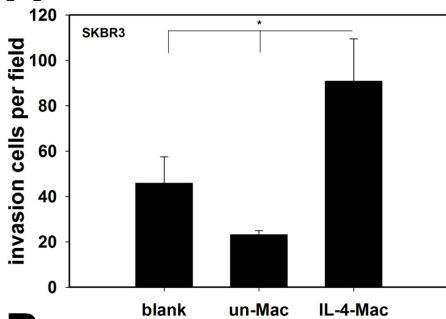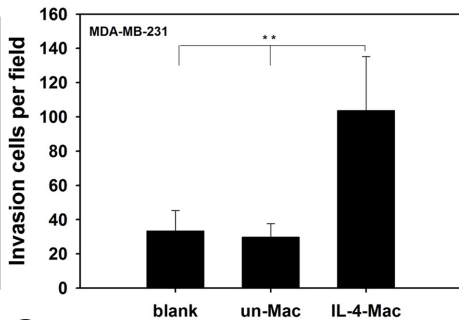**B**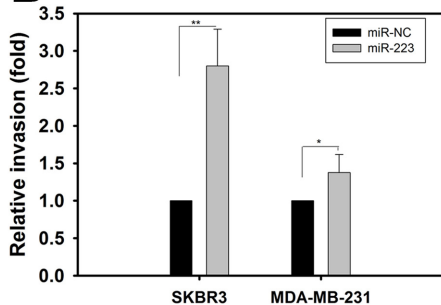**C**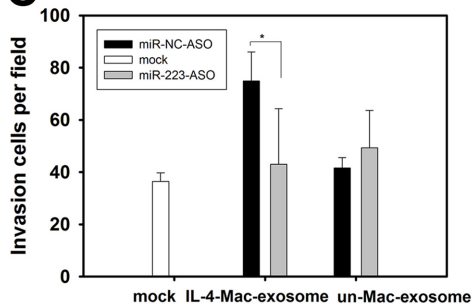

Supplement: MOESM12 [file 9551742]
